# Supplementary material
Source: publisher figshare collection journal article supplement (https://sage.figshare.com/ndownloader/files/20556561)
Supplement: Supplementary file 1 [file 20556561]

## CABI

### Classification of items

- |                                                                                                                                                                                               |                      |
|-----------------------------------------------------------------------------------------------------------------------------------------------------------------------------------------------|----------------------|
| 1. Your son/daughter often complains about some physical discomfort                                                                                                                           | Somatic              |
| 2. He is excessively worried about illnesses and/or that he will get ill                                                                                                                      | Illness anx.         |
| 3. He finds it difficult to fall asleep or says he does not sleep well.                                                                                                                       | Sleep                |
| 4. His sleep is disturbed by nightmares or waking up during the night                                                                                                                         | Sleep                |
| 5. He appears tense and/or anxious                                                                                                                                                            | Anxiety/tension      |
| 6. He tends to worry about everything                                                                                                                                                         | Anxiety/apprehension |
| 7. He worries about school too much                                                                                                                                                           | Anxiety /school      |
| 8. It is hard for him to be separated or far from his parents                                                                                                                                 | Separation anxiety   |
| 9. He is excessively shy                                                                                                                                                                      | Social anxiety       |
| 10. He is usually embarrassed around strangers or people he does not know very well                                                                                                           | Social anxiety       |
| 11. He is excessively afraid of something (e.g dark, be alone, insects, thieves.)                                                                                                             | Phobias              |
| 12. He is excessively afraid of dirt, so he has to wash continually                                                                                                                           | Mysophobia           |
| 13. There are repetitive actions or "rituals" that he frequently repeats and he says he cannot help doing them                                                                                | Compulsions          |
| 14. He has an obsessive need for things to be in a precise order                                                                                                                              | Compulsions          |
| 15. He is obsessed by unpleasant thoughts and cannot free himself from them                                                                                                                   | Obsessions           |
| 16. He is very afraid of making mistakes                                                                                                                                                      | Insecurity           |
| 17. It is hard for him to make decisions, even about unimportant things                                                                                                                       | Insecurity           |
| 18. Has he ever been involved in or witnessed particularly stressful events, after which his behaviour changed in some way? If so, indicate what behavioural changes occurred after the event | PTS                  |
| 19. He cries for no reason or about unimportant things                                                                                                                                        | Depr. Mood           |
| 20. He often seems sad                                                                                                                                                                        | D. Mood              |
| 21. He is often in a black mood ("depressed" mood)                                                                                                                                            | D. Mood              |
| 22. He says or shows that he is not happy                                                                                                                                                     | D. Mood              |
| 23. He shows no interest, not even in pleasant things                                                                                                                                         | D. Lack of interest  |
| 24. He feels inferior to others; he has low self-esteem                                                                                                                                       | D. Self esteem       |
| 25. He is often tired or listless; everything exhausts him                                                                                                                                    | D. Abulia            |
| 26. He blames himself too much                                                                                                                                                                | D. Guilt             |
| 27. He has sometimes said he does not want to live any longer                                                                                                                                 | D. Suicide           |
| 28. He has hurt himself or tried to hurt himself                                                                                                                                              | D. Suicide           |
| 29. He is very irritable                                                                                                                                                                      | (D/OD) Irritability  |
| 30. He often gets angry, even about unimportant things                                                                                                                                        | (D/OD) Irritability  |

|                                                                                                        |                      |
|--------------------------------------------------------------------------------------------------------|----------------------|
| 31. He has frequent, abrupt mood changes                                                               | (D/OD) Irritability  |
| 32. He is quick-tempered and has fits of anger                                                         | (D/OD) Irritability  |
| 33. He does not obey and it is difficult to make him obey                                              | Oppositional defiant |
| 34. He does not follow the rules                                                                       | Oppositional defiant |
| 35. He often tells lies or cheats                                                                      | Oppositional defiant |
| 36. He is domineering and always wants to assert himself                                               | Oppositional defiant |
| 37. He quarrels frequently.                                                                            | Oppositional defiant |
| 38. He bothers and intentionally annoys others                                                         | Oppositional defiant |
| 39. He often hits people                                                                               | Conduct dis.         |
| 40. He destroys things                                                                                 | Conduct dis.         |
| 41. He is or has been cruel to animals or people                                                       | Conduct dis.         |
| 42. He has committed petty theft                                                                       | Conduct dis.         |
| 43. He is impulsive and acts before thinking                                                           | Impulsivity          |
| 44. He tends not to take turns when he is playing                                                      | Impulsivity          |
| 45. He interrupts, disturbing games and others' conversations                                          | Impulsivity          |
| 46. He is always moving around and cannot stay still                                                   | Hyperactivity        |
| 47. He cannot sit down for a long time but has to get up                                               | Hyperactivity        |
| 48. He runs and jumps everywhere in an exaggerated way                                                 | Hyperactivity        |
| 49. He has trouble concentrating while doing his homework                                              | Attention            |
| 50. He has trouble paying attention to something for a long period                                     | Attention            |
| 51. He gets tired very quickly even when he is playing                                                 | Attention            |
| 52. He feels persecuted                                                                                | Reality testing      |
| 53. He is overly suspicious                                                                            | Reality testing      |
| 54. Sometimes he has strange ideas                                                                     | Reality testing      |
| 55. Sometimes he says he sees or hears things that are not there                                       | Reality testing      |
| 56. He has difficulty in relating to and interacting with others                                       | Relationships        |
| 57. He cannot make real friends or does not seem interested in doing so                                | Relationships        |
| 58. He does not play willingly with his peers                                                          | Relationships        |
| 59. He does not seem to express emotions using appropriate facial expressions                          | Relationships        |
| 60. His behaviour is "strange", unlike that of his peers                                               | Relationships        |
| 61. He asks inappropriate questions, like overly-personal questions to strangers at inopportune times. | Relationships        |
| 62. He sometimes wets the bed                                                                          | Enuresis             |
| 63. He sometimes dirties his pants during the day                                                      | Encopresis           |

|                                                                                |             |
|--------------------------------------------------------------------------------|-------------|
| 64. He stuffs himself with food                                                | Bulimia     |
| 65. He keeps to a strict diet (not prescribed by a doctor or dietician)        | Anorexia    |
| 66. He feels too fat or says that parts of his body are too fat                | Anorexia    |
| 67. He has recently lost a lot of weight                                       | Anorexia    |
| 68. He appears to be overly interested in sex                                  | Sex         |
| 69. He shows he would like to be of the opposite sex                           | Sex         |
| 70. He smokes                                                                  | Subst.abuse |
| 71. He drinks alcohol                                                          | Subst.abuse |
| 72. He uses drugs (smokes hashish or other dangerous substances)               | Subst.abuse |
| 73. He does not do well at school                                              | School      |
| 74. He has recently done much less well at school                              | School      |
| 75. His classmates or other children make fun of him, threaten or mistreat him | Bullying    |

Items 1 to 28: internalizing problems.

Items 33 to 42 externalizing problems and 43 to 51 attention-deficit hyperactivity problems.

The complete CABI questionnaire is reported with open access in Cianchetti et al. *Clinical Practice & Epidemiology in Mental Health*, 2013;9: 51–61, corrected in *Clinical Practice & Epidemiology in Mental Health*, 2019;15: 44–48.

Otherwise it can be requested to the author at [cianchet@unica.it](mailto:cianchet@unica.it).

Moreover, an electronic version with .xls data collection and scoring is available for free on request.
